# Supplementary material for: Direct evidence for cell adhesion-mediated radioresistance (CAM-RR) on the level of individual integrin β1 clusters
Source: PubMed Central journal article supplement (PMC5469790; doi:10.1038/s41598-017-03414-4), 2017-06-13
Supplement: 41598_2017_3414_MOESM1_ESM.pdf [file 41598_2017_3414_MOESM1_ESM.pdf]

1 **Supplementary of:**

2

3 Direct evidence for cell adhesion-mediated radioresistance  
4 (CAM-RR) on the level of individual integrin  $\beta$ 1 clusters

5

6 **Laura Babel<sup>1,2</sup>, Miriam Grunewald<sup>1,2</sup>, Robert Lehn<sup>1</sup>, Markus Langhans<sup>1</sup>, Tobias Meckel<sup>1,2</sup>**

7

8 1 Membrane Dynamics, Department of Biology, Technische Universität Darmstadt, Germany

9 2 GRK 1657, Molecular and cellular responses to ionizing radiation, Technische Universität

10 Darmstadt, Germany

11

12

13

14

15

16

17  **$\beta$ 3 and  $\alpha$ v integrins are affected by IR in an entirely different manner as  $\beta$ 1**  
18 **integrins**

19

20 **Results**

21 Integrin heterodimers of  $\alpha$ v $\beta$ 1 and  $\alpha$ v $\beta$ 3 are well characterized ECM-binding integrins. To  
22 investigate if IR has an effect on integrins containing  $\alpha$ v and  $\beta$ 3 subunits comparative  
23 experiments were performed and results are displayed in in **S12 - 18** and in **S-table 1**. Both  
24 subunits showed a different reaction towards IR if compared to  $\beta$ 1 integrins.

25 The most outstanding difference is shown in the effect of IR on integrins containing a  $\beta$ 3  
26 subunit. While the clustering (H max) shows a similar trend if compared to the results obtained  
27 from the  $\beta$ 1 experiments, the severity of the initial effect 2 min after an irradiation with 2 Gy  
28 and 15 Gy of 2D cells is not comparable. R max is not affected if irradiated with 2 Gy and  
29 shows only a slight decrease after an irradiation with 15 Gy. An irradiation with 2 Gy of 3D  
30 cultured cells led to an increase in H max and r max, an irradiation with 15 Gy led only to a  
31 slight decrease in H max and had no effect on r max. In almost all parameters analyzed in **S-**  
32 **table 1** no or only slight differences were detected after an irradiation with 2 and 15 Gy of cells  
33 cultured in 2D or 3D. Only the number of molecules and the number of clusters increased  
34 significantly 2 min after an irradiation with 15 Gy of 2D cells.

35 Integrins containing a  $\alpha$ v subunit of 2D cells show in their clustering (H max) and their cluster  
36 radius (r max) a comparable trend towards IR if compared to the  $\beta$ 1 results seen in **Figure 4**.  
37 An irradiation with 2 Gy of 3D cultured cells led to an increase in H max with no significant  
38 effect on r max. 3D cells irradiated with 15 Gy showed no significant effect in H max as well as  
39 in r max (**S7**). The reaction of the parameters seen in **S-table 1** towards IR is comparable if  
40 the cells were cultured in 2D and irradiated with 2 and 15 Gy, only the number of clusters  
41 increases with the higher dose. All other parameters decreased and regenerated with time.  
42 The effect of 2 Gy on 3D cultured cells is comparable, but not as distinct as observed by 2D  
43 cultured cells. Surprisingly, the effects of IR on  $\alpha$ v integrins of 3D cultured cells differ greatly if  
44 the cells was irradiated with 2 or 15 Gy. While an irradiation with 2 Gy led to a slight decrease  
45 in all parameters, an irradiation with 15 Gy led to an increase, while the ratio of clustered /  
46 unclustered signals of 3D cultured cells does not change. These results show that not only the  
47 ECM binding  $\beta$ 1 integrins are affected by IR in dependence of the cell culture system, also  
48 integrins containing the  $\alpha$ v or  $\beta$ 3 subunit may contribute to CAM-RR.

49

50

51

52

53

54

55

56

57 **Discussion**

58  $\beta 3$  integrins of 2D cultured cells are only slightly affected by an irradiation with 2 Gy (we could  
59 only detect a slight, still significant decrease in H max), an irradiation with 15 Gy had only a  
60 slight effect on the cluster radius but we could detect a significant decrease of the clustering 2  
61 min after irradiation (**see S 12**). The most significant changes were detected in the number of  
62 molecule and clusters, both parameters increased 2 min after irradiation. Since the ratio of  
63 clustered / unclustered signals was constant as well as the cluster density and the signals per  
64 cluster, our results indicate that  $\beta 3$  integrins are upregulated and new clusters were generated.  
65 The effects of IR on  $\beta 3$  integrin differ in dependence of the cell culture system. 3D cultured  
66 cells irradiated with 2 Gy showed an increase in their clustering and cluster radius, but we  
67 could not detect distinct effects on the parameters in **S-table 1**, therefore we assume that  $\beta 3$   
68 integrin clusters are compressed. Surprisingly, an irradiation with 15 Gy of 3D cultured cells  
69 revealed no such effects. Only a minor decrease of the clustering was detected.  $\beta 3$  integrin  
70 clusters of 3D cultured cells are affected after an irradiation with a low dose (2 Gy) but not after  
71 an irradiation with a high dose (15 Gy), 2D cultured cells are only affected after an irradiation  
72 with a higher dose (15 Gy) but show a completely different membrane located radiation  
73 response mechanismen.

74

75 Integrins containing the  $\alpha v$  subunit are affected by IR in dependence of the dose and cell  
76 culture system.  $\alpha v$  integrins of 2D cultured cells irradiated with 2 Gy showed a decrease in  
77 their clustering and cluster radius, as well as in all other parameter (except the number of  
78 clusters) from **S-table 1**. After an irradiation with 2 Gy we could detect more unclustered  
79 signals. Since the number of molecules decreased, we assume that the  $\alpha v$  integrins emerge  
80 from the cluster by a combined axial and lateral membrane transport as reported for the  $\beta 1$   
81 response mechanismen for higher doses. This mechanism also applies for 2D cells irradiated  
82 with 15 Gy. But, here we could also detect an increase in the number of clusters. This indicates,  
83 that the  $\alpha v$  integrins do not simply emerge from the the clusters, they also form new clusters -  
84  $\alpha v$  clusters fragment after irradiation with 15 Gy of 2D cultured cells. An irradiation with 2 Gy  
85 on 3D cultured cells had the same effect on  $\alpha v$  and  $\beta 3$  integrins: the clustering and the cluster  
86 radius increase, leading to a compression of the clusters by a lateral diffusion. The effects of  
87 15 Gy on  $\alpha v$  and  $\beta 3$  integrins of 3D cultured cells is not comparable: only minor decreases in  
88 the clustering and the cluster radius of  $\alpha v$  integrins were detected, the number of molecules  
89 and clusters as well as the signals per cluster increased after IR.  $\alpha v$  integrins are upregulated  
90 and form new clusters after irradiation.

91

92

93

94

95

96 **Supplementary figures**

97

98

**S-table1: Percental change of various parameter after IR of  $\beta_3$  and  $\alpha_v$  integrins of 2D and 3D cultured MEF cells.**

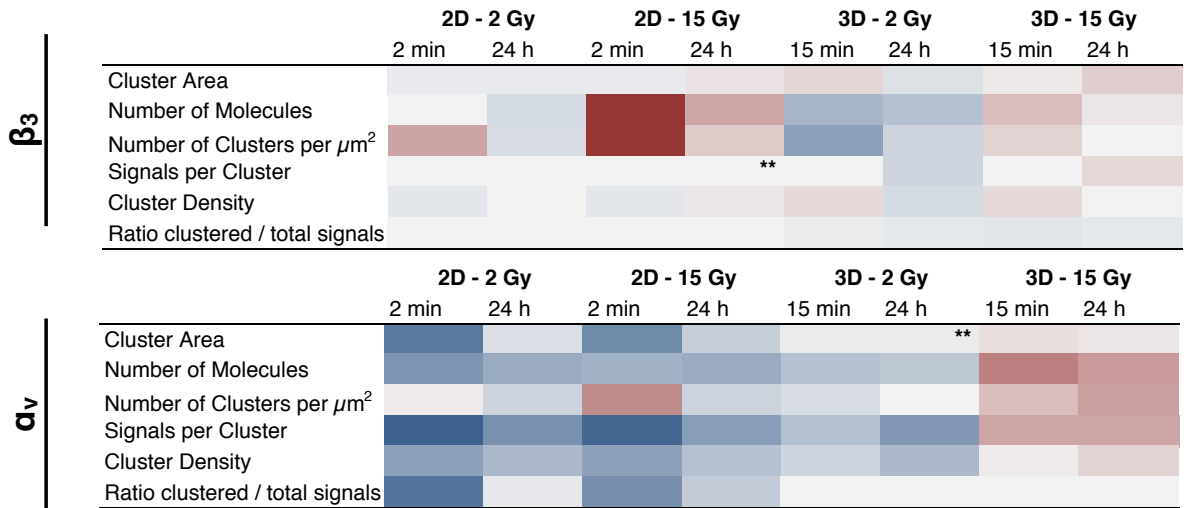

\*\* 6 h instead of 24 h

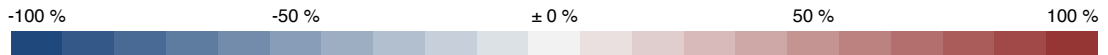

99

100

101

102

103

104

105

106

107

108

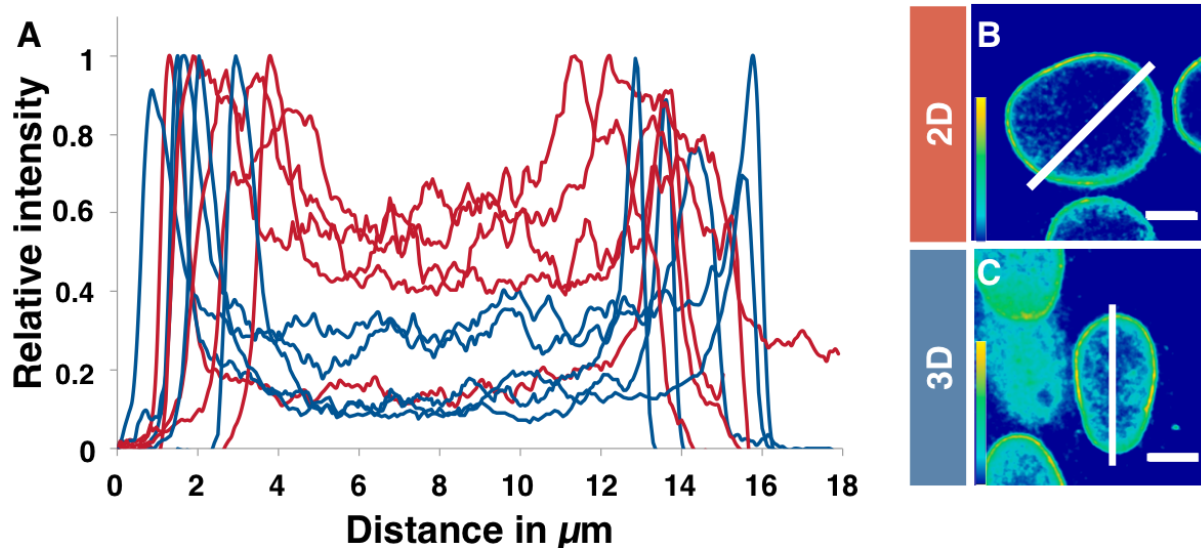

109  
 110 **S 1: Line profiles of Lamin A/C of 2D (red) and 3D (blue) cultured cells.** (A) Relative  
 111 intensities of line profiles with a width of 3.5  $\mu\text{m}$  of a Lamin A/C staining from cells cultured in  
 112 2D (red) and 3D (blue).  $N=1$ ,  $n=5$  for 2D and 3D cultured cells. (B, C) Heat map of a Lamin  
 113 A/C immunostaining of 2D (B) and 3D (C) cultured cells including an exemplary line profile  
 114 plotted in (A). Scale bar is 5  $\mu\text{m}$ .

115  
 116

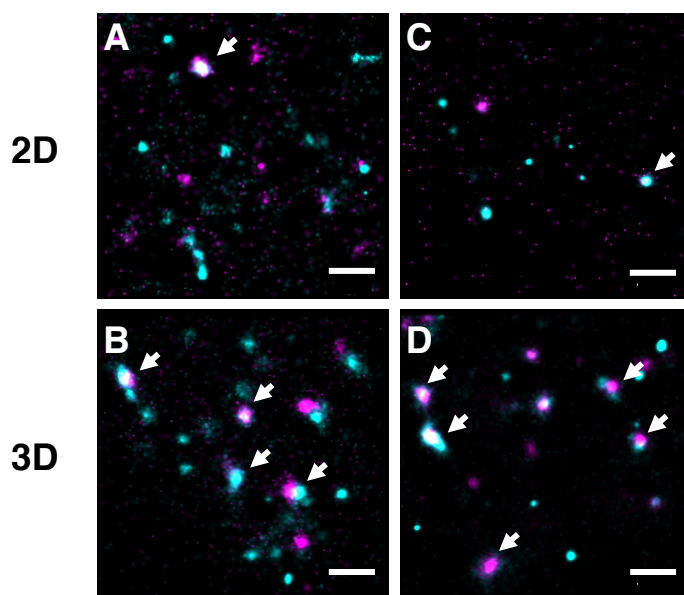

117  
 118 **S 2: Colocalization of integrins of MEF cells cultured in 2D or 3D.** (A)  $\alpha_v$  (magenta) and  $\beta_1$   
 119 (cyan) of 2D cultured cells. (B) Corresponding data for 3D cultured cells. (C)  $\alpha_v$  (magenta) and  
 120  $\beta_3$  (cyan) of 2D cultured cells. (D) Corresponding data for 3D cultured cells. Scale bar is 2  $\mu\text{m}$ .  
 121 Arrows indicate integrin-subunit colocalization (white).

122

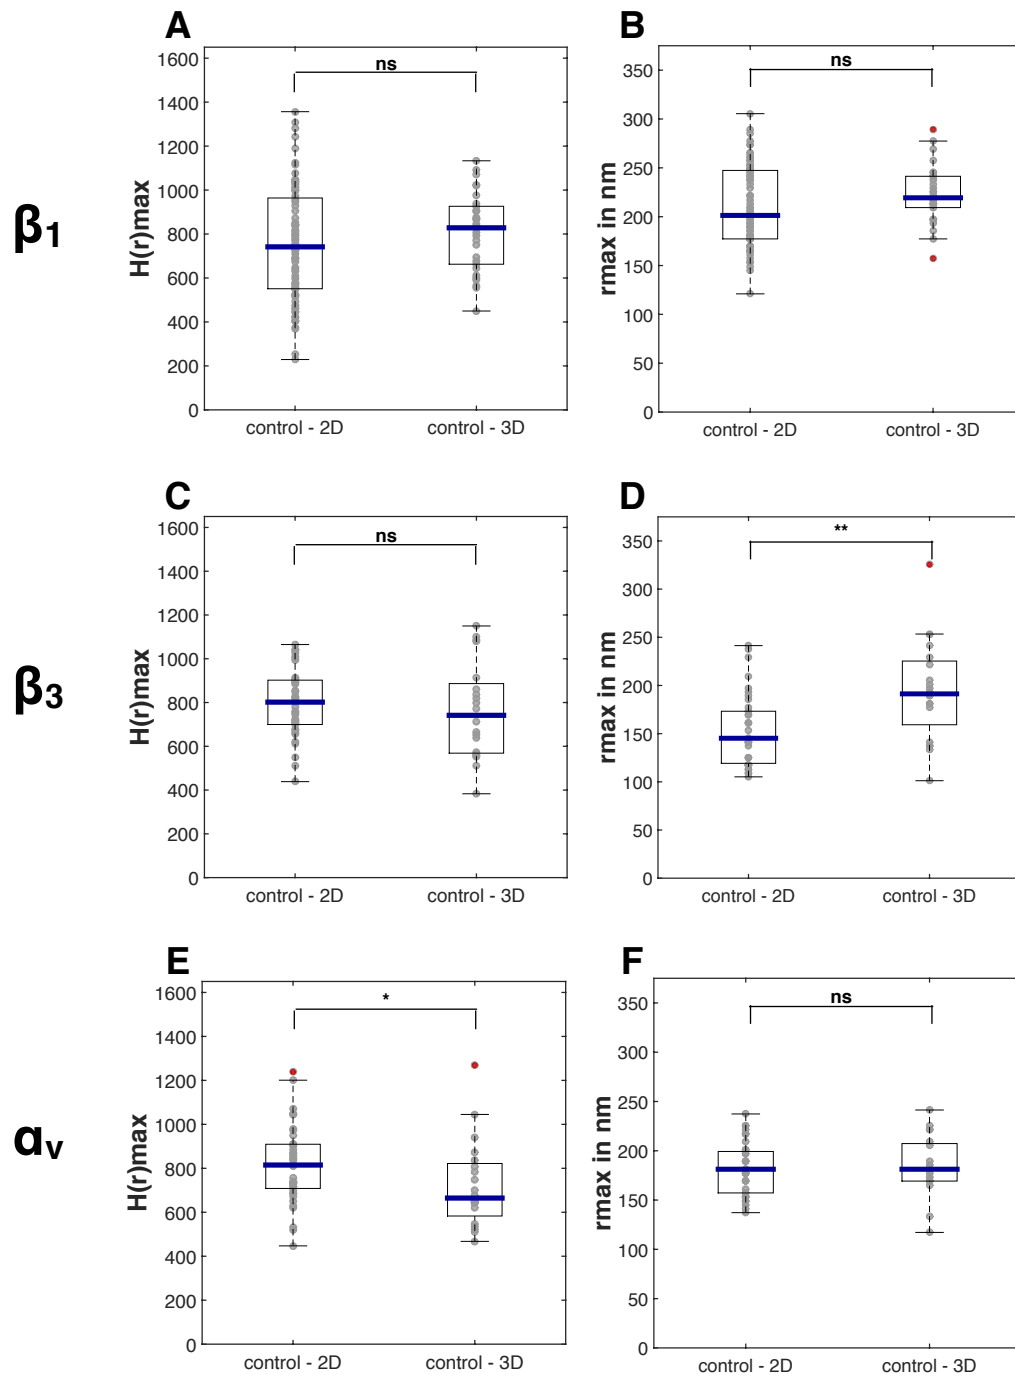

123  
124  
125  
126  
127  
128  
129  
130  
131  
132  
133  
134

**S 3: Clustering and cluster radius of all controls of  $\beta_1$ ,  $\beta_3$  and  $\alpha_v$  integrins.** (A) Box plot of the clustering (H(r)max) of  $\beta_1$  integrins of 2D (N=8, n=80) and 3D (N=6, n=30) cultured control cells. (B) Box plot of the cluster radius r of  $\beta_1$  integrins of 2D (N=8, n=80) and 3D (N=6, n=30) cultured control cells. (A, B) Statistical analysis was performed with an ordinary one-way ANOVA. (C) Box plot of the clustering (H(r)max) of  $\beta_3$  integrins of 2D (N=4, n=40) and 3D (N=4, n=20) cultured control cells. (D) Box plot of the cluster radius r of  $\beta_3$  integrins of 2D (N=4, n=40) and 3D (N=4, n=10) cultured control cells. (C, D) Statistical analysis was performed with an ordinary one-way ANOVA. (E) Box plot of the clustering (H(r)max) of  $\alpha_v$  integrins of 2D (N=4, n=40) and 3D (N=4, n=20) cultured control cells. (F) Box plot of the cluster radius r of  $\alpha_v$  integrins of 2D (N=4, n=40) and 3D (N=4, n=20) cultured control cells. (E, F) Statistical analysis was performed with a Kruskal - Wallis test. \*p ≤ 0.05, \*\*p ≤ 0.01. NS, not significantly different.

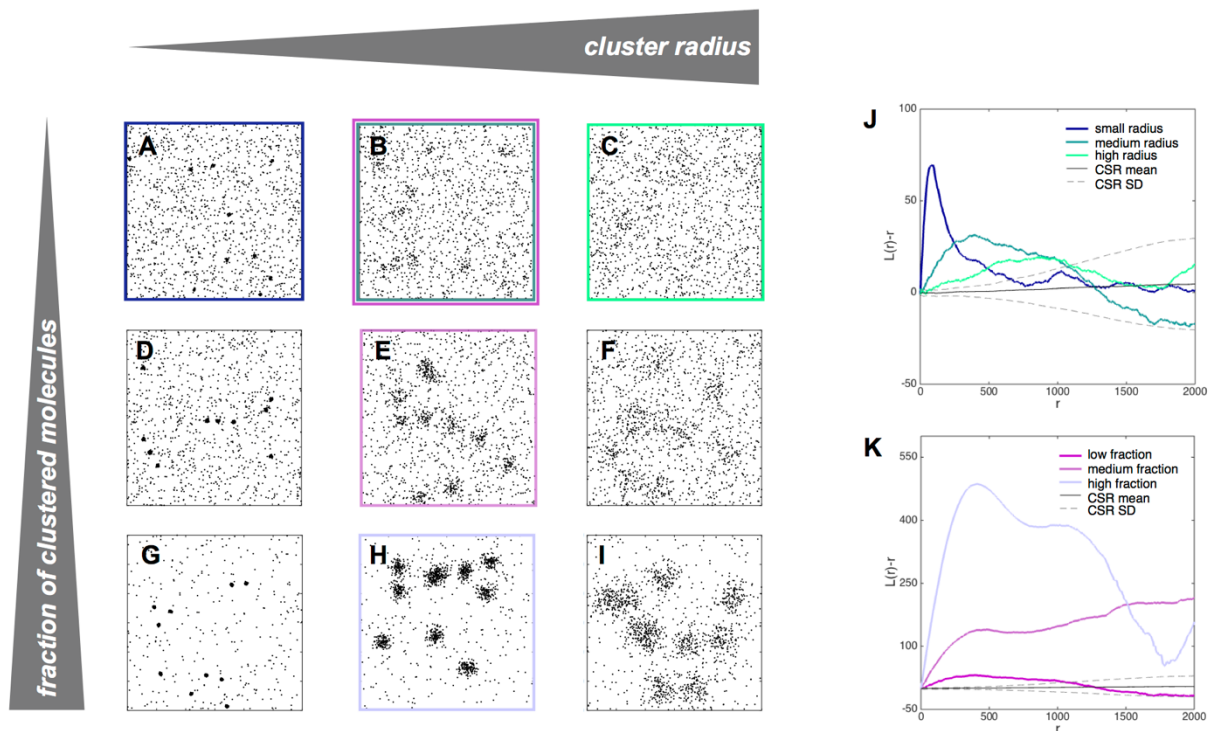

135  
 136  
 137  
 138  
 139  
 140  
 141  
 142  
 143  
 144  
 145  
 146  
 147  
 148  
 149  
 150  
 151

**S 4: Simulated data demonstrating the influence of cluster radius and the fraction of clustered molecules on the H-function.** While the cluster radius is depicted as the first maximum of the H-function, the clustering degree correlates with the value of  $L(r)-r$ . (A-I) Simulated distributions of 1500 molecules including 10 clusters with varying cluster radii and clustering degrees. In the upper row (A-C) the 10 cluster each consist of 20 molecules, in the middle row (D-E) clusters contain 50 molecules and in the lower row (G-I) clusters comprise 120 molecules. The cluster radius increases from left to right with a small radius in the left column (A, D and G), a medium radius for the middle column (B, E and H) and large radius in the right column (C, F and I). J and K show the corresponding H functions for the upper row (J) and the middle column (K) and the mean and standard deviation of 1500 completely random distributed molecules from 100 simulations. The cluster radius is depicted in the H-plot as the first maximum of the H-function at the scale of the highest clustering degree. Hence for expanding cluster radii  $r_{max}$  increases (J). With higher cluster ratios the maximum of  $L(r)-r$  increases (K). The radius of clusters against a background of unclustered molecules likewise impacts the clustering degree, hence in J  $L(r)-r_{max}$  decreases with higher cluster radii.

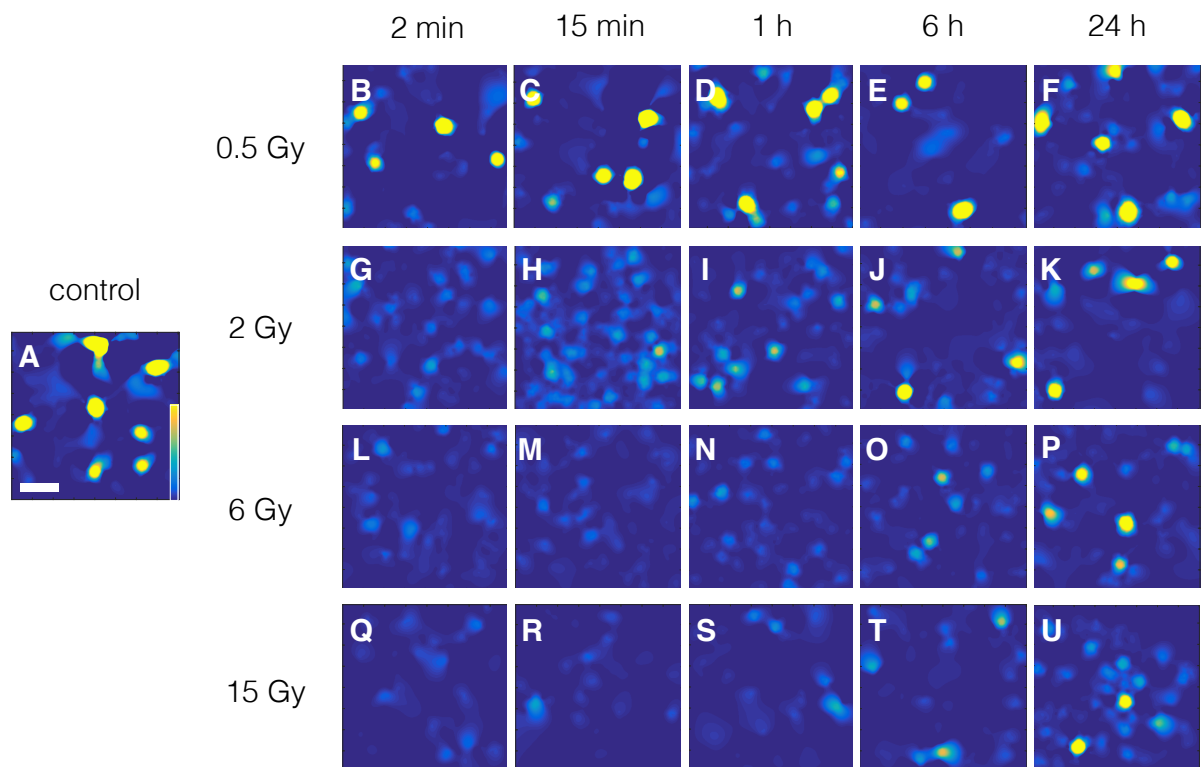

152  
153  
154  
155  
156  
157  
158  
159

**S 5: Effects of IR on the clustering of  $\beta_1$  integrins of 2D cultured cells.** Heat maps visualising unclustered (dark blue) and clustered (yellow) regions. Cells were irradiated with 0.5, 2, 6 and 15 Gy and were fixed 2 min, 15 min, 1 h, 6 h and 24 h after irradiation. (A) Control. (B-F) Cells irradiated with 0.5 Gy. (G-K) Cells irradiated with 2 Gy. (L-P) Cells irradiated with 6 Gy and (Q-U) cells irradiated with 15 Gy. Scale bar is 1  $\mu\text{m}$ .

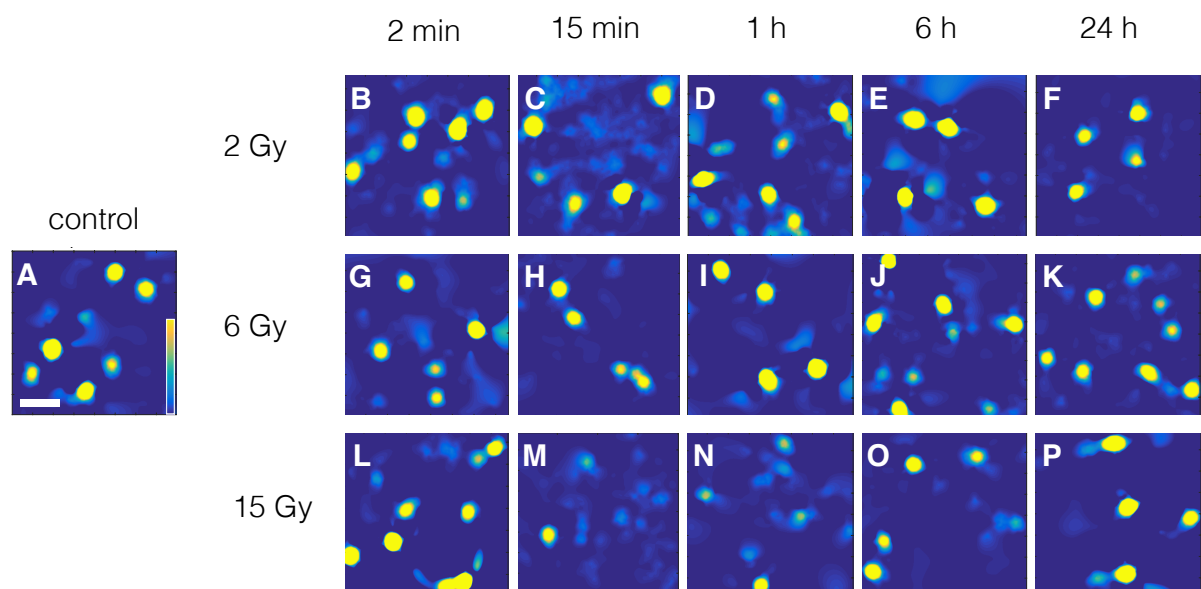

160  
161  
162  
163  
164  
165

**S 6: Effects of IR on the clustering of  $\beta_1$  integrins of 3D cultured cells.** Heat maps visualising unclustered (dark blue) and clustered (yellow) regions. Cells were irradiated with 2, 6 and 15 Gy and were fixed 2 min, 15 min, 1 h, 6 h and 24 h after irradiation. (A) Control. (B-D) Cells irradiated with 2 Gy. (G-K) Cells irradiated with 6Gy. (L-P) Cells irradiated with 15 Gy. Scale bar is 1  $\mu\text{m}$ .



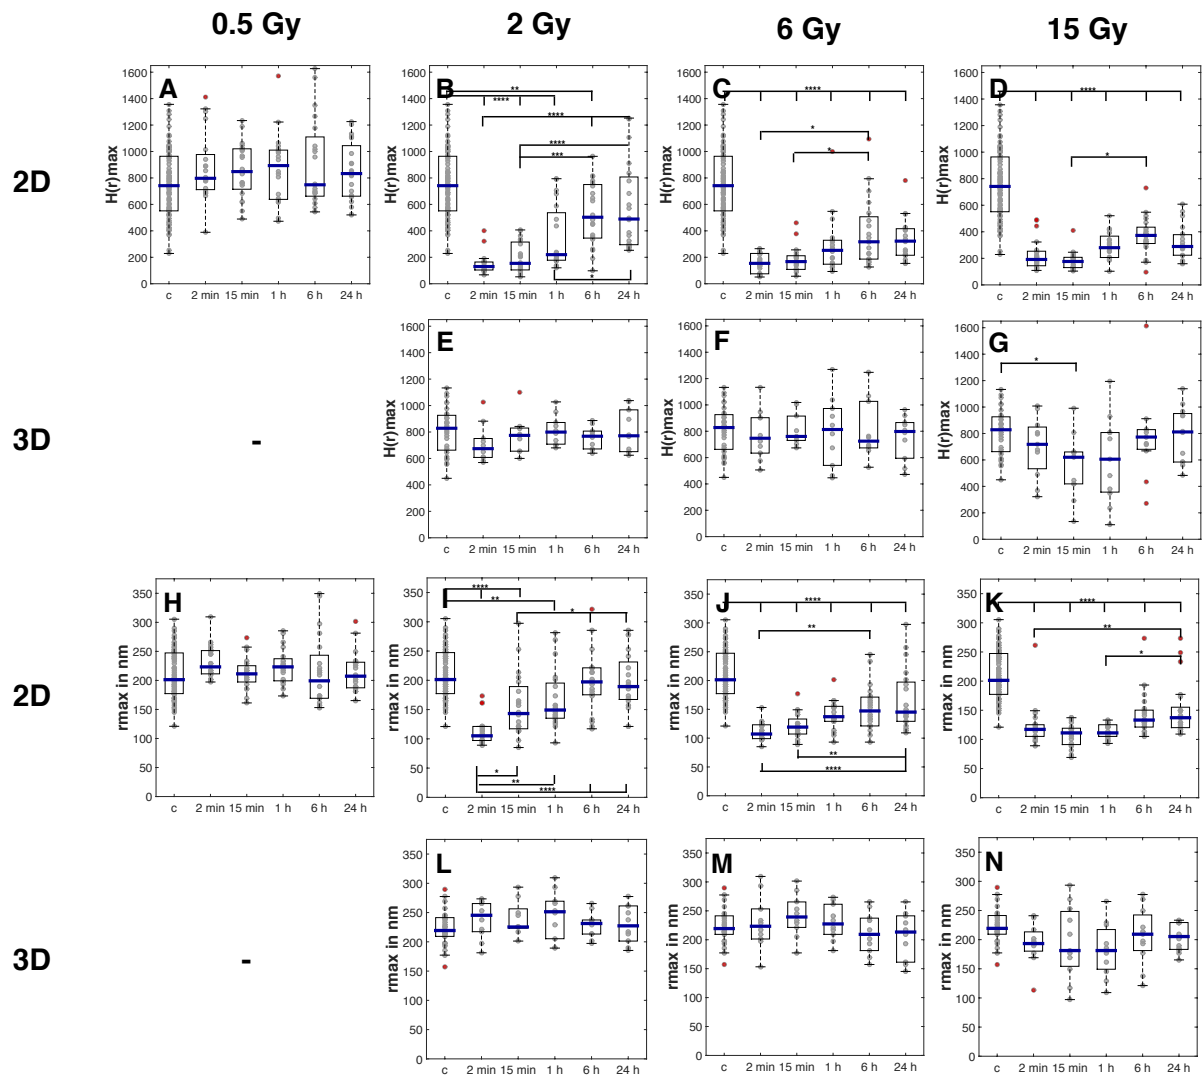

166

167

168

169

170

171

172

173

174

175

**S 7: Effects of IR on the clustering (A-G) and the cluster radius (H-N) of  $\beta_1$  integrins of 2D and 3D cultured cells.** Box plots of the clustering  $H(r)_{max}$  or the cluster radius  $r$  in nm plotted against the time (control (c), 2 min, 15 min, 1 h, 6 h and 24 h). 2D cultured cells were irradiated with 0.5, 2, 6 and 15 Gy (A-D, H-K), 3D cultured cells were irradiated with 2, 6 and 15 Gy (E-G, L-N). For 2D cells  $N=2$ ,  $n=20$ . controls were pooled,  $N=8$ ,  $n=80$ . For 3D cells  $N=2$ ,  $n=10$ . Controls were pooled,  $N=6$ ,  $n=30$ . Statistical analysis was performed with an ordinary one-way ANOVA (A, D, E, F, G, H, I, K, L, M) or with a Kruskal -Wallis test (B, C, F, N). \* $p \leq 0.05$ , \*\* $p \leq 0.01$ , \*\*\* $p \leq 0.001$  and \*\*\*\* $p \leq 0.0001$ . If not further noted no significance was detected.

2D

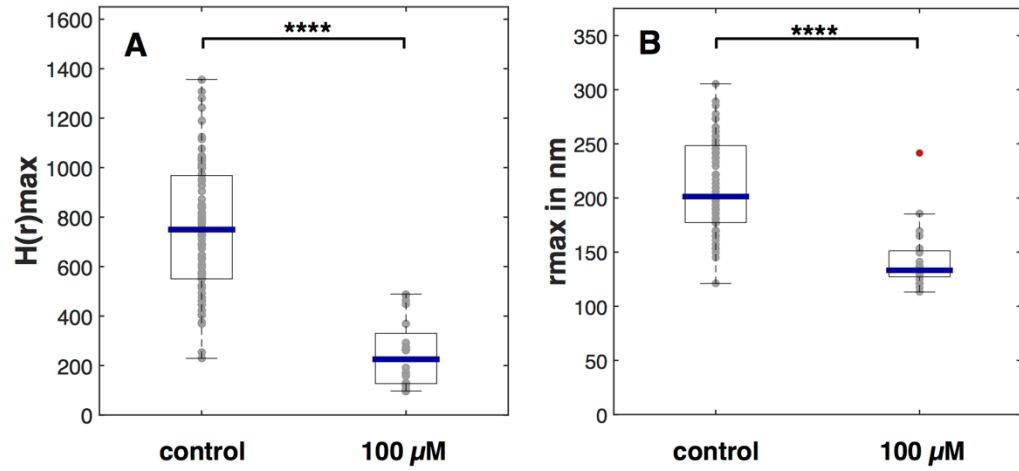

3D

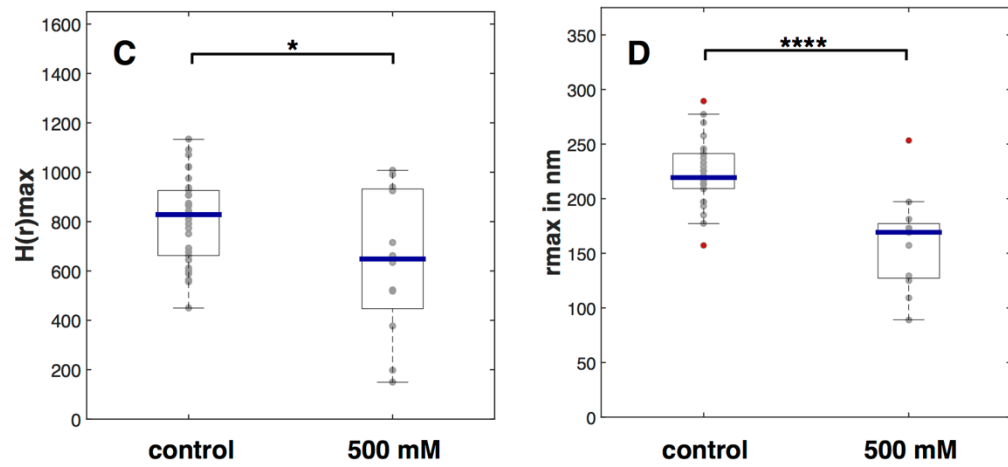

176

177

178

179

180

181

182

**S 8: Cluster disintegration is induced by ROS.** Box plots of the clustering  $H(r)_{max}$  (A, C) and the cluster radius  $r$  in nm (B, D) of controls and cells treated with 100  $\mu\text{M}$   $\text{H}_2\text{O}_2$  (2D, A and B) or of controls and cells treated with 500 mM  $\text{H}_2\text{O}_2$  (3D, C and D).  $N=1$ ,  $n=20$ . Statistical analysis was performed with a two-tailed Mann-Whitney test for (A) or with a two-tailed, unpaired t-test for (B, C, D). \* $p \leq 0.05$ , \*\*\*\* $p \leq 0.0001$ .

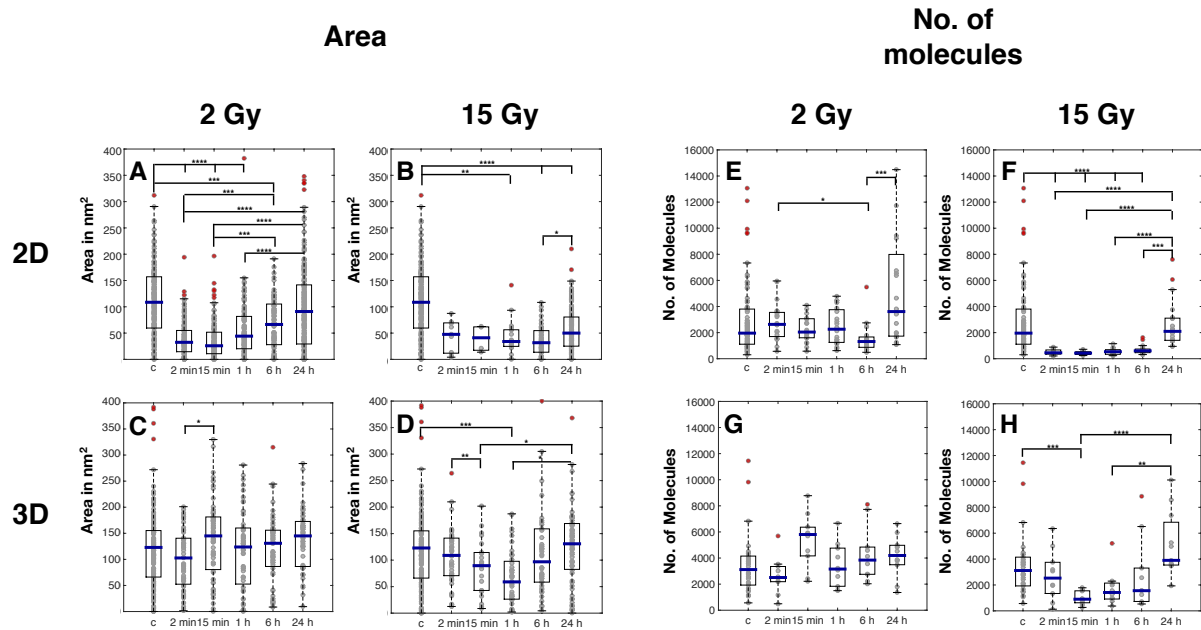

183  
 184  
 185  
 186  
 187  
 188  
 189  
 190  
 191  
 192

**S 9: Effects of IR on the cluster area (A-D) and the number of molecules per ROI (E-H) of  $\beta_1$  integrins of 2D (A/B, E/F) and 3D (C/D, G/H) cultured cells.** Box plots of the cluster area and the number of molecules, plotted against the time (2 min, 15 min, 1 h, 6 h, 24 h and the control (c)). Cells were irradiated with 2 or 15 Gy. For 2D cells N=2, n=20. controls were pooled, N=8, n=80. For 3D cells N=2, n=10. Controls were pooled, N=6, n=30. Statistical analysis was performed with an ordinary one-way ANOVA (B, C, D, H) or with a Kruskal - Wallis test (A, E, F, G). \* $p \leq 0.05$ , \*\* $p \leq 0.01$ , \*\*\* $p \leq 0.001$  and \*\*\*\* $p \leq 0.0001$ . If not further noted no significance was detected.

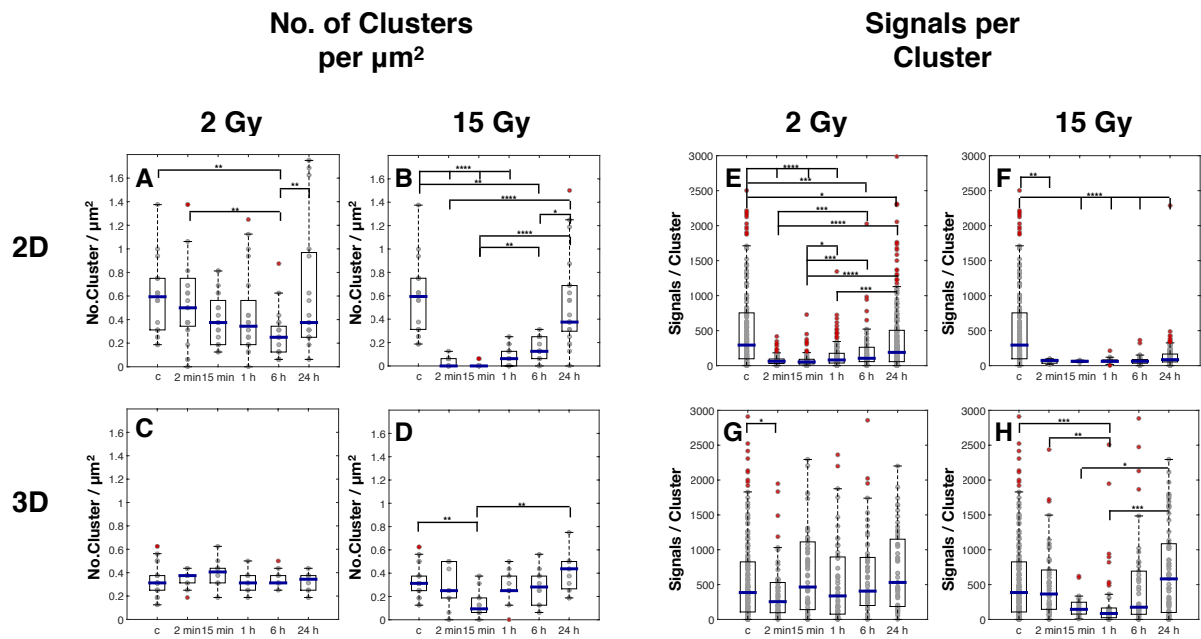

193

194

195 **S 10: Effects of IR on the number of clusters per  $\mu\text{m}^2$  (A-D) and the number of signals**

196 **per cluster (E-H) of  $\beta_1$  integrins of 2D (A/B, E/F) and 3D (C/D, G/H) cultured cells. Box**

197 **plots of the number of clusters per  $\mu\text{m}^2$  and the number of signals per cluster, plotted against**

198 **the time (2 min, 15 min, 1 h, 6 h, 24 h and the control (c)). Cells were irradiated with 2 or 15**

199 **Gy. For 2D cells N=2, n=20. controls were pooled, N=8, n=80. For 3D cells N=2, n=10. Controls**

200 **were pooled, N=6, n=30. Statistical analysis was performed with an ordinary one-way ANOVA**

201 **(A, C, D, E, F, H) or with a Kruskal - Wallis test (B, G). \* $p \leq 0.05$ , \*\* $p \leq 0.01$ , \*\*\* $p \leq 0.001$  and**

202 **\*\*\*\* $p \leq 0.0001$ . If not further noted no significance was detected.**

202

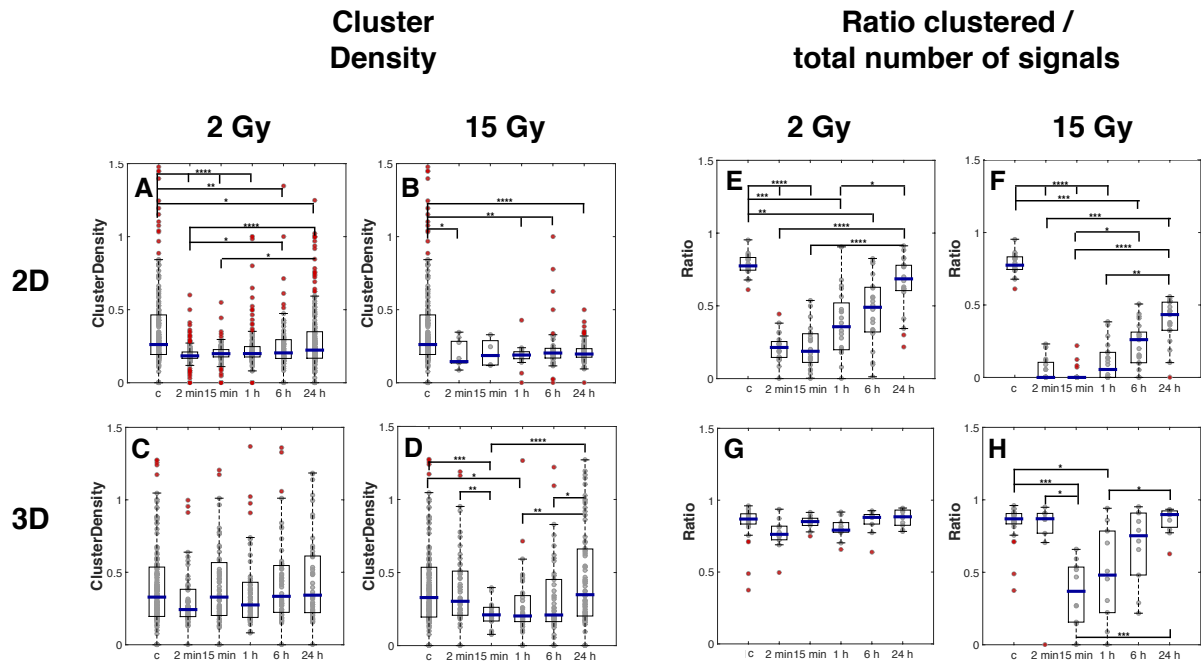

203

204

205

206

207

208

209

210

211

212

**S 11: Effects of IR on the cluster density (A-D) and the ratio of clustered / total number of signals (E-H) of  $\beta_1$  integrins of 2D (A/B, E/F) and 3D (C/D, G/H) cultured cells.** Box plots of the cluster density and the ratio of clustered/unclustered signals, plotted against the time (2 min, 15 min, 1 h, 6 h, 24 h and the control (c)). Cells were irradiated with 2 or 15 Gy. For 2D cells N=2, n=20. controls were pooled, N=8, n=80. For 3D cells N=2, n=10. Controls were pooled, N=6, n=30. Statistical analysis was performed with an ordinary one-way ANOVA (C, G) or with a Kruskal - Wallis test (A, B, E, F, H). \* $p \leq 0.05$ , \*\* $p \leq 0.01$ , \*\*\* $p \leq 0.001$  and \*\*\*\* $p \leq 0.0001$ . If not further noted no significance was detected.

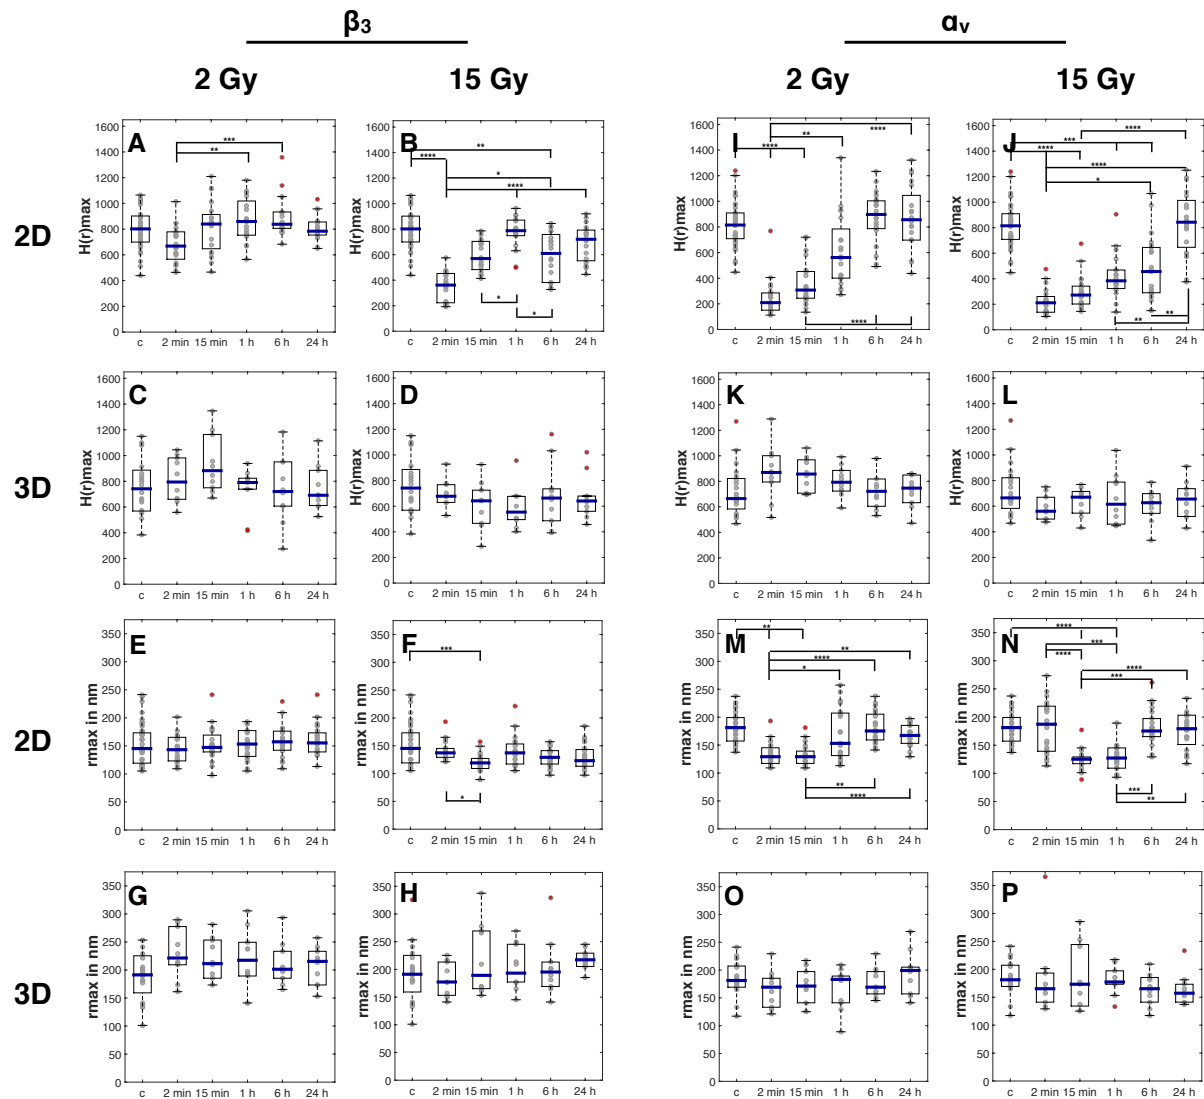

213

214 **S 12: Effects of IR on the clustering and the cluster radius of  $\beta_3$  (A-H) and  $\alpha_v$  (I-P)**

215 **integrins of 2D (A/B, e/F, I/J, O/P) and 3D (C/D, E/F, K/L, M/N) cultured cells.** Box plot of

216 the clustering  $H(r)$  max or the cluster radius  $r$  in nm plotted against the time (control (c), 2 min,

217 15 min, 1 h, 6 h and 24 h). Cells were irradiated with 2 or 15 Gy. For 2D cells  $N=2$ ,  $n=20$ .

218 controls were pooled,  $N=4$ ,  $n=40$ . For 3D cells  $N=2$ ,  $n=10$ . Controls were pooled,  $N=4$ ,  $n=20$ .

219 Statistical analysis was performed with an ordinary one-way ANOVA (A, C, D, E, G, H, K, L,

220 O, P) or with a Kruskal - Wallis test (B, F, I, J, M, N). \* $p \leq 0.05$ , \*\* $p \leq 0.01$ , \*\*\* $p \leq 0.001$  and

221 \*\*\*\* $p \leq 0.0001$ . If not further noted no significance was detected.

222

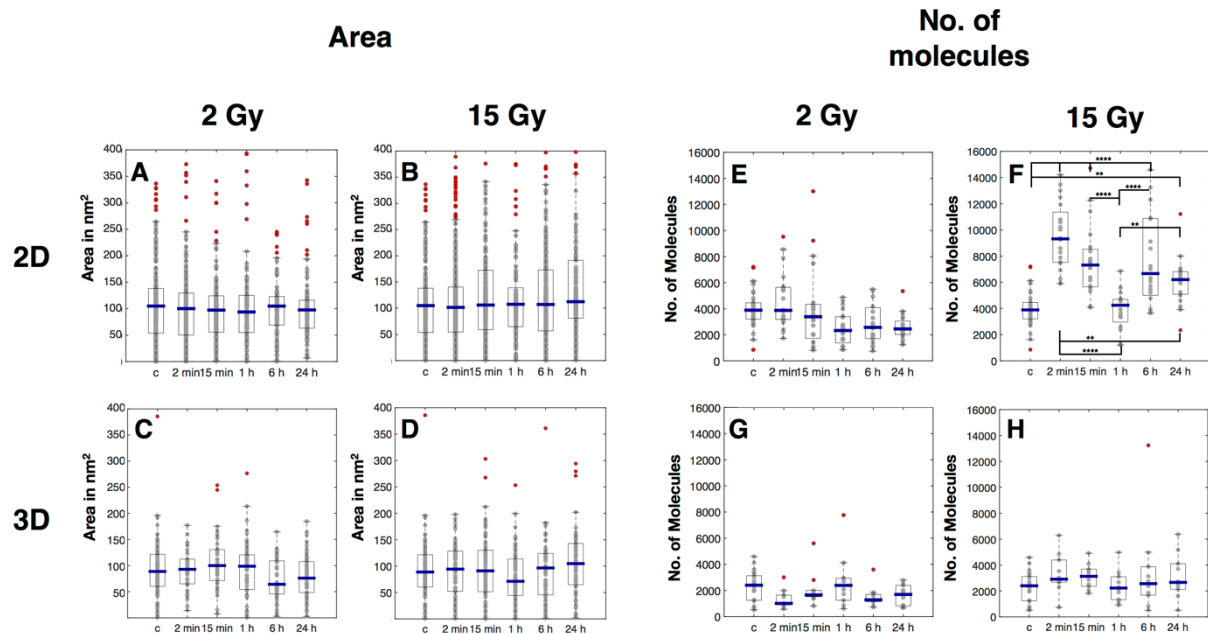

223  
 224  
 225  
 226  
 227  
 228  
 229  
 230  
 231

**S 13: Effects of IR on the cluster area (A-D) and the number of molecules per ROI (E-H) of  $\beta_3$  integrins of 2D (A/B, E/F) and 3D (C/D, G/H) cultured cells.** Box plots of the cluster area and the number of molecules, plotted against the time (2 min, 15 min, 1 h, 6 h, 24 h and the control (c)). Cells were irradiated with 2 or 15 Gy. For 2D cells N=2, n=20. controls were pooled, N=4, n=40. For 3D cells N=2, n=10. Controls were pooled, N=4, n=20. Statistical analysis was performed with an ordinary one-way ANOVA (A - H). \* $p \leq 0.05$ , \*\* $p \leq 0.01$ , \*\*\* $p \leq 0.001$  and \*\*\*\* $p \leq 0.0001$ . If not further noted no significance was detected.

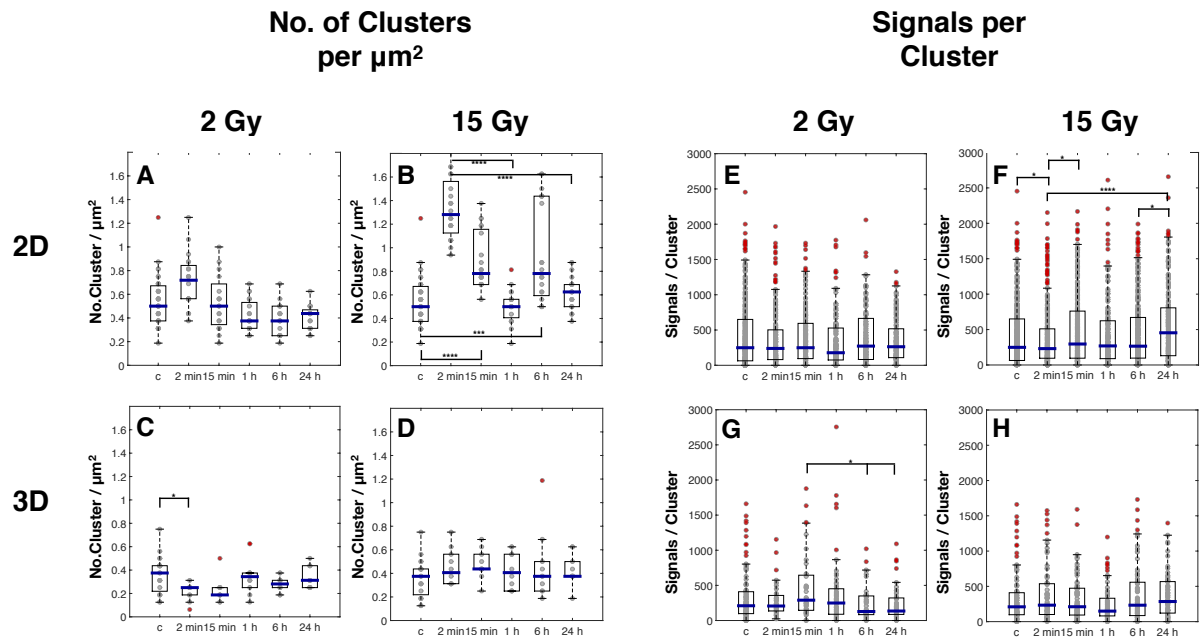

232

233

234

235

236

237

238

239

240

241

**S 14: Effects of IR on the number of clusters per  $\mu\text{m}^2$  (A-D) and the number of signals per cluster (E-H) of  $\beta_3$  integrins of 2D (A/B, E/F) and 3D (C/D, G/H) cultured cells. Box plots of the number of clusters per  $\mu\text{m}^2$  and the number of signals per cluster, plotted against the time (2 min, 15 min, 1 h, 6 h, 24 h and the control (c)). Cells were irradiated with 2 or 15 Gy. For 2D cells N=2, n=20. controls were pooled, N=4, n=40. For 3D cells N=2, n=10. Controls were pooled, N=4, n=20. Statistical analysis was performed with an ordinary one-way ANOVA (A, C - H) or with a Kruskal - Wallis test (B). \*p  $\leq$  0.05, \*\*p  $\leq$  0.01, \*\*\*p  $\leq$  0.001 and \*\*\*\*p  $\leq$  0.0001. If not further noted no significance was detected.**



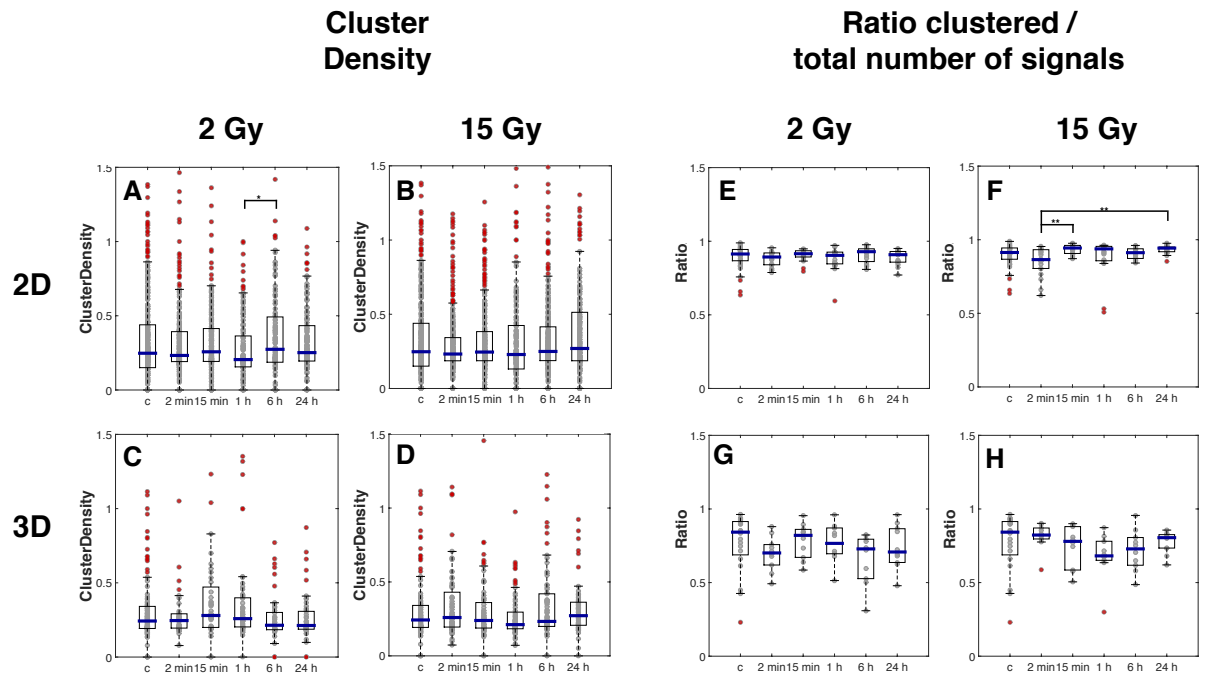

242

243

244

245

246

247

248

249

250

251

**S 15: Effects of IR on the cluster density (A-D) and the ratio of clustered / total number of signals (E-H) of  $\beta_3$  integrins of 2D (A/B, E/F) and 3D (C/D, G/H) cultured cells.** Box plots of the cluster density and the ratio of clustered/unclustered signals, plotted against the time (2 min, 15 min, 1 h, 6 h, 24 h and the control (c)). Cells were irradiated with 2 or 15 Gy. For 2D cells N=2, n=20. controls were pooled, N=4, n=40. For 3D cells N=2, n=10. Controls were pooled, N=4, n=20. Statistical analysis was performed with an ordinary one-way ANOVA (A, C, D, E, G, H) or with a Kruskal - Wallis test (B, F). \*p  $\leq$  0.05, \*\*p  $\leq$  0.01, \*\*\*p  $\leq$  0.001 and \*\*\*\*p  $\leq$  0.0001. If not further noted no significance was detected.

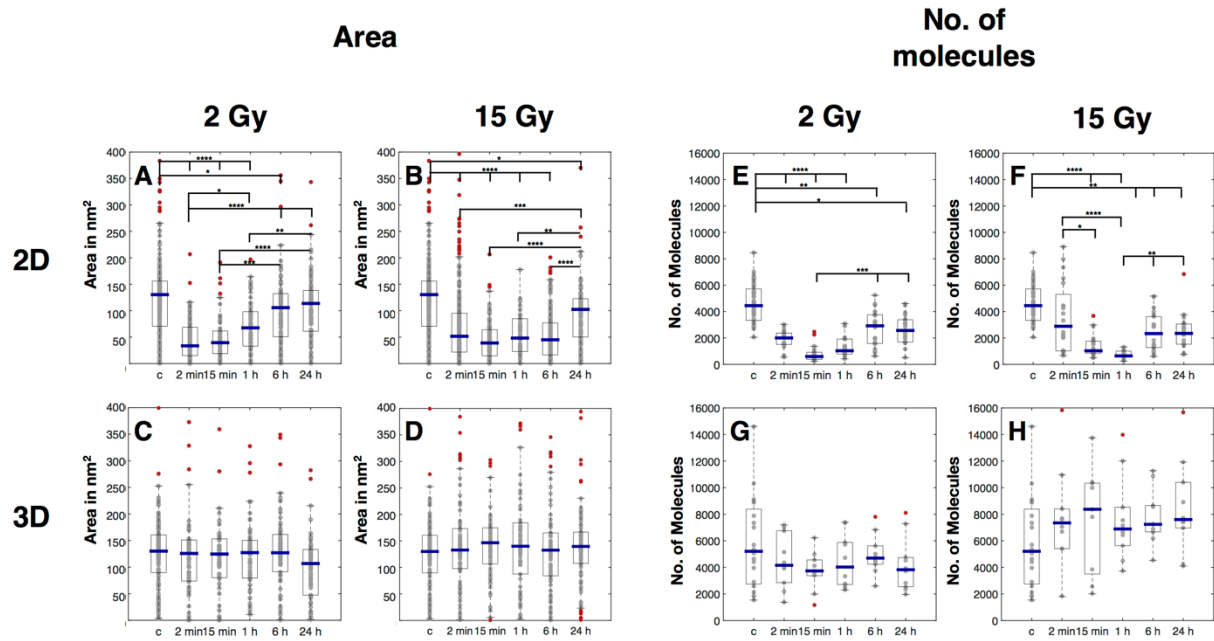

252

253

254

255

256

257

258

259

260

261

**S 16: Effects of IR on the cluster area (A-D) and the number of molecules per ROI (E-H) of  $\alpha_v$  integrins of 2D (A/B, E/F) and 3D (C/D, G/H) cultured cells.** Box plots of the cluster area and the number of molecules, plotted against the time (2 min, 15 min, 1 h, 6 h, 24 h and the control (c)). Cells were irradiated with 2 or 15 Gy. For 2D cells N=2, n=20. controls were pooled, N=4, n=40. For 3D cells N=2, n=10. Controls were pooled, N=4, n=20. Statistical analysis was performed with an ordinary one-way ANOVA (C, G, H) or with a Kruskal - Wallis test (A, B, D, E, F). \* $p \leq 0.05$ , \*\* $p \leq 0.01$ , \*\*\* $p \leq 0.001$  and \*\*\*\* $p \leq 0.0001$ . If not further noted no significance was detected.

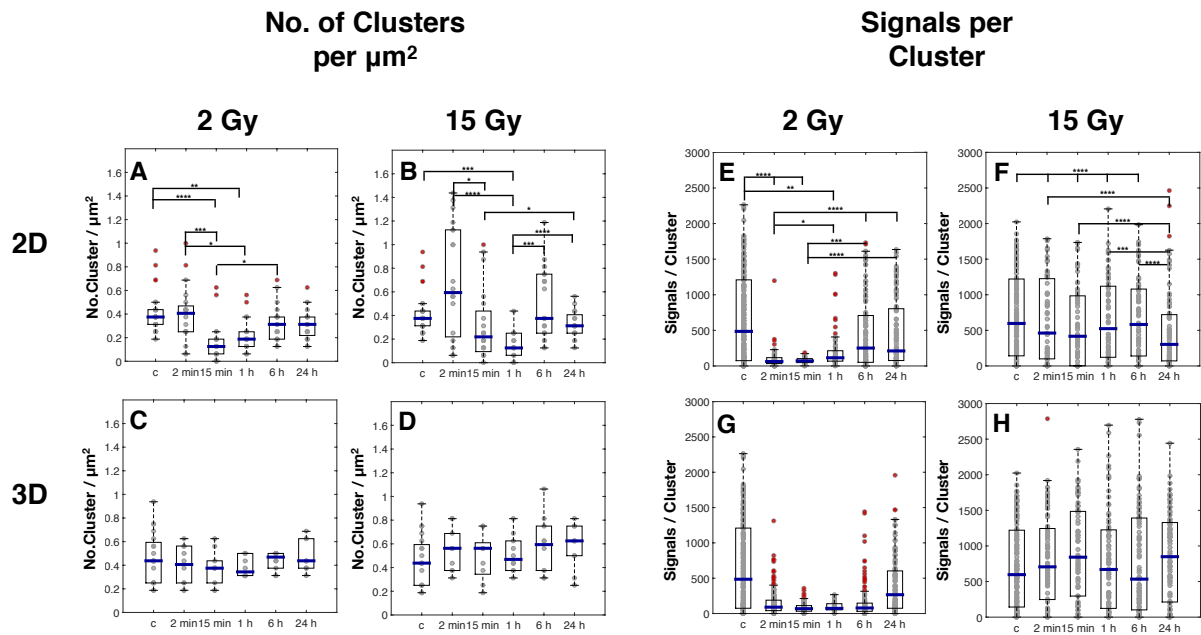

262  
 263  
 264  
 265  
 266  
 267  
 268  
 269  
 270  
 271

**S 17: Effects of IR on the number of clusters per  $\mu\text{m}^2$  (A-D) and the number of signals per cluster (E-H) of  $\alpha_v$  integrins of 2D (A/B, E/F) and 3D (C/D, G/H) cultured cells.** Box plots of the number of clusters per  $\mu\text{m}^2$  and the number of signals per cluster, plotted against the time (2 min, 15 min, 1 h, 6 h, 24 h and the control (c)). Cells were irradiated with 2 or 15 Gy. For 2D cells N=2, n=20. controls were pooled, N=4, n=40. For 3D cells N=2, n=10. Controls were pooled, N=4, n=20. Statistical analysis was performed with an ordinary one-way ANOVA (A, C, D, G, H) or with a Kruskal - Wallis test (B, E, F). \* $p \leq 0.05$ , \*\* $p \leq 0.01$ , \*\*\* $p \leq 0.001$  and \*\*\*\* $p \leq 0.0001$ . If not further noted no significance was detected.

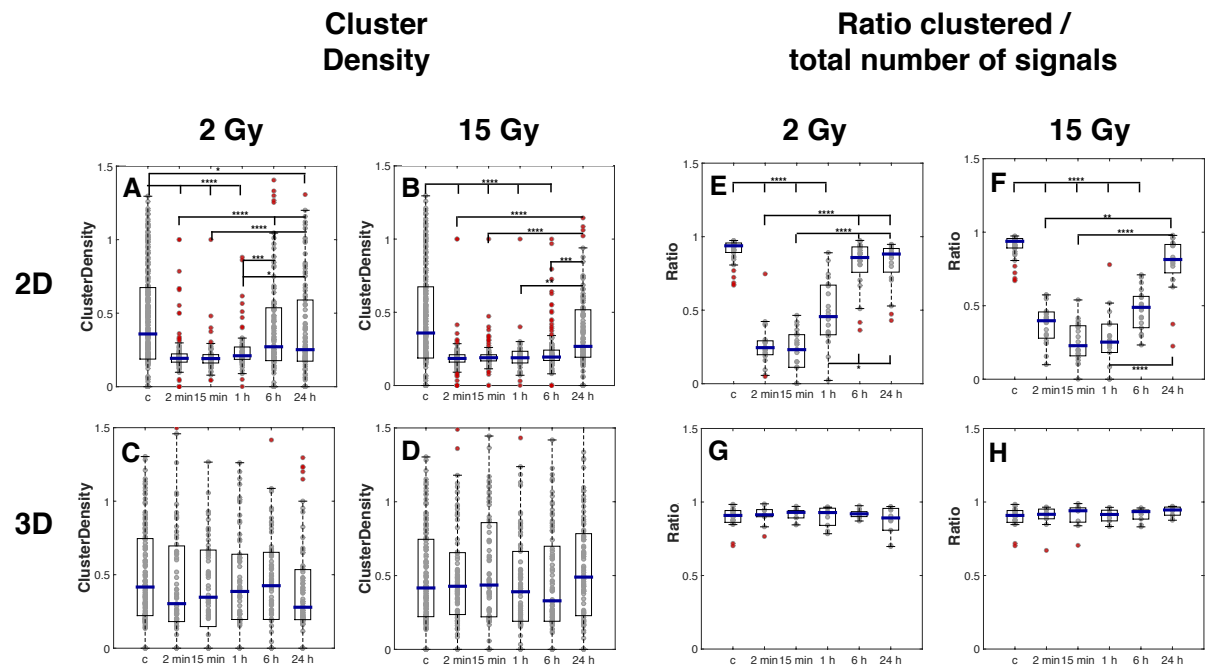

272  
 273  
 274  
 275  
 276  
 277  
 278  
 279  
 280  
 281

**S 18: Effects of IR on the cluster density (A-D) and the ratio of clustered / total number of signals (E-H) of  $\alpha_v$  integrins of 2D (A/B, E/F) and 3D (C/D, G/H) cultured cells.** Box plots of the cluster density and the ratio of clustered/unclustered signals, plotted against the time (2 min, 15 min, 1 h, 6 h, 24 h and the control (c)). Cells were irradiated with 2 or 15 Gy. For 2D cells N=2, n=20. controls were pooled, N=4, n=40. For 3D cells N=2, n=10. Controls were pooled, N=4, n=20. Statistical analysis was performed with an ordinary one-way ANOVA (C, D, G, H) or with a Kruskal - Wallis test (A, B, E, F). \* $p \leq 0.05$ , \*\* $p \leq 0.01$ , \*\*\* $p \leq 0.001$  and \*\*\*\* $p \leq 0.0001$ . If not further noted no significance was detected.

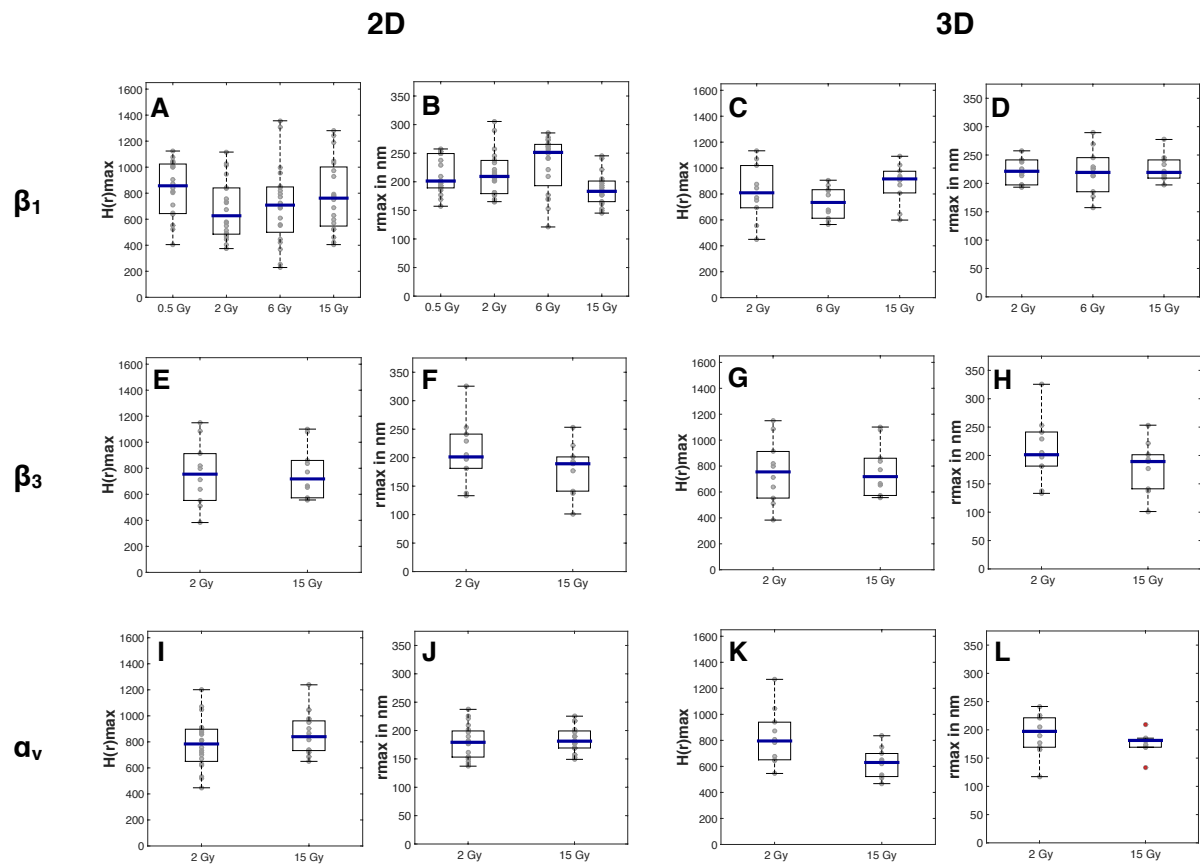

282

283

284

285

286

287

288

289

**S 19: All pooled controls of  $\beta_1$ (A-D),  $\beta_3$  (E-H) and  $\alpha_v$  (I-L) integrins of 2D (A/B, E/F, I,J) and 3D cultured cells (C/D, G/H, K/L). Box plots of the clustering  $H(r)_{max}$  and the cluster radius  $r$  in nm plotted against the dose. Cells stained for  $\beta_1$  integrin were irradiated with 0.5, 2, 6 and 15 Gy if cultured in 2D, 3D cultured cells were irradiated with 2, 6 and 15 Gy. 2D and 3D cultured cells stained for  $\beta_3$  and  $\alpha_v$  were irradiated with 2 and 15 Gy. For 2D cells  $N=2$ ,  $n=20$ . For 3D cells  $N=2$ ,  $n=10$ .**
